# Supplementary material
Source: publisher figshare collection journal article supplement (https://acs.figshare.com/ndownloader/files/3972280)

# **Polysaccharide from Seeds of *Plantago asiatica* L. Affects Lipid Metabolism and Colon Microbiota of Mouse**

Jie-Lun Hu<sup>1,2</sup>, Shao-Ping Nie<sup>\*1</sup>, Qi-Meng Wu<sup>1</sup>, Chang Li<sup>1</sup>, Zhi-Hong Fu<sup>1</sup>, Joshua  
Gong<sup>1,2</sup>, Steve W. Cui<sup>1,2</sup>, Ming-Yong Xie<sup>1</sup>

<sup>1</sup> *State Key Laboratory of Food Science and Technology, Nanchang University,  
Nanchang 330047, China*

<sup>2</sup> *Guelph Food Research Center, Agriculture and Agri-Food Canada, 93 Stone Road  
West, Guelph, Ont., N1G 5C9, Canada*

\* Corresponding authors:

Professor Shao-Ping Nie, PhD

Tel& Fax: +86-791-88304452 (S. P. NIE)

E-mail address: [spnie@ncu.edu.cn](mailto:spnie@ncu.edu.cn).

## Supporting information

The structure of the polysaccharide from the seeds of *P. asiatica* L. has been published by our research group as follows: <sup>8</sup> (Rhap, rhamno-pyranosyl; Ara<sub>f</sub>, arabino-furanosyl; Xyl<sub>p</sub>, xylo-pyranosyl; Gal<sub>p</sub>, galacto-pyranosyl; Glc<sub>p</sub>, gluco-pyranosyl; GlcA<sub>p</sub>, glycuronic acid pyranosyl).

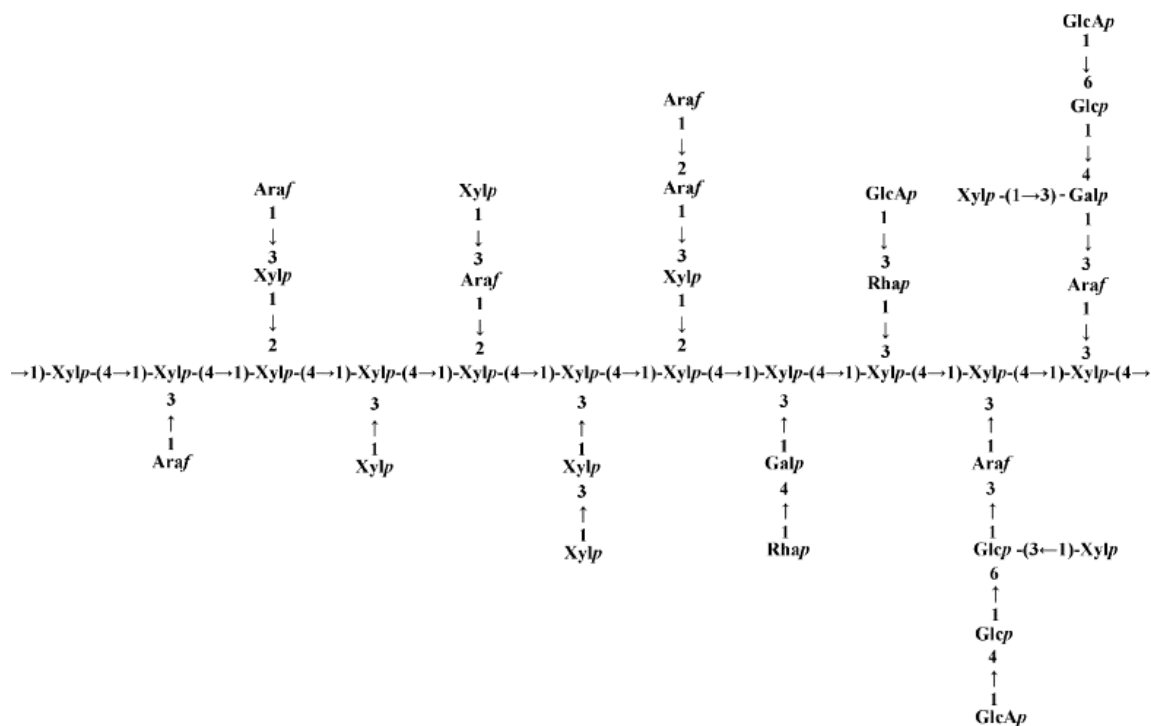

Supplement: Supplementary file 1 [file 3972280]
